# Supplementary material for: Membralin Selects Foreign Glycoproteins from the Endoplasmic Reticulum to Lysosomes for Degradation
Source: Research Square preprint supplement (doi:10.21203/rs.3.rs-6498082/v1), 2025-06-23

**Table S1.** **Oligos used for the establishment of KO cell lines**

| Primer | sense（5′-3′） | antisense（5′-3′） |
| --- | --- | --- |
| TMEM259-gRNA1 | caccgGGTCGCGCACGTTGATGAG | aaacCTCATCAACGTGCGCGACCc |
| TMEM259-gRNA2 | caccgGAACTCGAAGAGACGGCGGA | aaacTCCGCCGTCTCTTCGAGTTCc |
| FAM134B-gRNA1 | caccgGCTTCCAGCTCAGCAGCTCGT | aaacACGAGCTGCTGAGCTGGAAGCc |
| FAM134B-gRNA2 | caccgGCAATACAGTGGCTGAGCCT | aaacAGGCTCAGCCACTGTATTGCc |
| RTN3-gRNA1 | caccgGAGGCTGGCTCCCTAACACA | aaacTGTGTTAGGGAGCCAGCCTCc |
| RTN3-gRNA2 | caccgGGAGATGGAATGGGACTGAG | aaacCTCAGTCCCATTCCATCTCCc |
| ATL3-gRNA1 | caccgGCCACCACCACATCAAGATCT | aaacAGATCTTGATGTGGTGGTGGCc |
| ATL3-gRNA2 | caccgGTGGTCCTGCAAGAGGATGC | aaacGCATCCTCTTGCAGGACCACc |
| SEC62-gRNA1 | caccgGAAGCTTTATTTACAACCA | aaacTGGTTGTAAATAAAGCTTCc |
| SEC62-gRNA2 | caccgGAACCCGGTGACCCATCATAT | aaacATATGATGGGTCACCGGGTTCc |
| CCPG1-gRNA1 | caccgAGAAACTGCTTATCCAGCTT | aaacAAGCTGGATAAGCAGTTTCTc |
| CCPG1-gRNA2 | caccgGTCTAACTTAGGTGGCTCAA | aaacTTGAGCCACCTAAGTTAGACc |
| TEX264-gRNA1 | caccgGTGATAAGTGCCGATGTGCCG | aaacCGGCACATCGGCACTTATCACc |
| TEX264-gRNA2 | caccgGTGGCCTTTGCCGGGTACTCA | aaacTGAGTACCCGGCAAAGGCCACc |
| MAN1B1-gRNA1 | caccgCAAATCCACCCGTCTTACC | aaacGGTAAGACGGGTGGATTTGc |
| MAN1B1-gRNA2 | caccgAAATCTCAGGTAAGTTCTC | aaacGAGAACTTACCTGAGATTTc |
| EDEM2-gRNA1 | caccgTGCTCATCTGCTCTCCAAGA | aaacTCTTGGAGAGCAGATGAGCAc |
| EDEM2-gRNA2 | caccgCCTGAGAATGGCTGAGGAGG | aaacCCTCCTCAGCCATTCTCAGGc |
| SEC61B-gRNA1 | caccgACCCCCAGTGGCACTAACGT | aaacACGTTAGTGCCACTGGGGGTc |
| SEC61B-gRNA2 | caccgGCGCTCTCCCAGCAAAGCAG | aaacCTGCTTTGCTGGGAGAGCGCc |

**Fig. S1. MAN1B1 does not engage with known ER-phagy receptors.**

**(A)** Indicated ER-phagy receptor genes were knocked out in HEK293T cells by CRISPR/Cas9, and their expression was confirmed by WB. **(B)** Class I fusion proteins were expressed with MAN1B1 in HKE293T WT and indicated ER-phagy receptor KO cell lines, and their expression was determined by WB. **(C)** Class I fusion and VSV-G proteins were expressed with MAN1B1 in HKE293T WT and *FAM134C*-KO cells, and their expression was determined by WB.

**
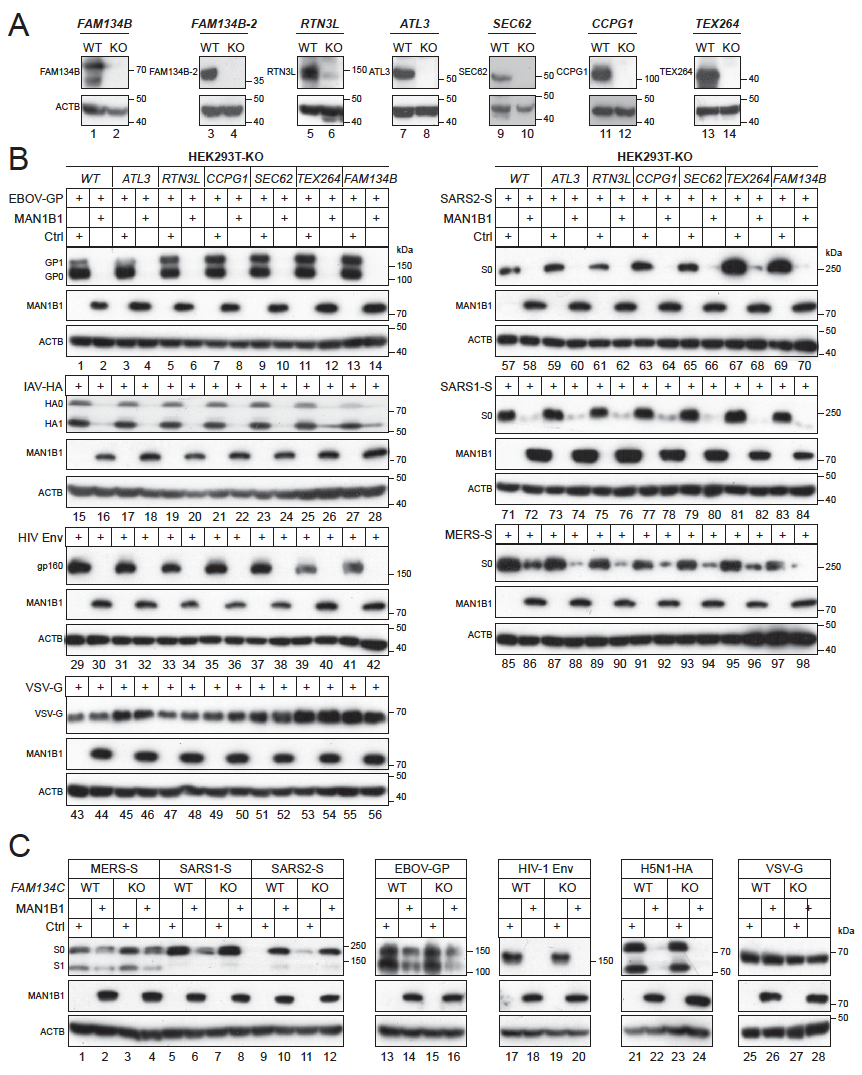
**

**Fig. S2. MAN1B1 and Membralin act independently of the SEC61 translocon.**

**(A)** Class I fusion proteins were expressed with MAN1B1 or TMEM259 in HEK293T cells in the presence of SEC61A siRNAs or a control siRNA, and their expression was determined by WB. **(B)** *SEC61B* was knocked out in HEK293T cells, and two KO clones (B3, B6) were confirmed by WB. **(C)** Class I fusion proteins were expressed with MAN1B1 or Membralin in HEK293T WT or *SEC61B*-KO (B3) cells, and their expression was determined by WB.

**
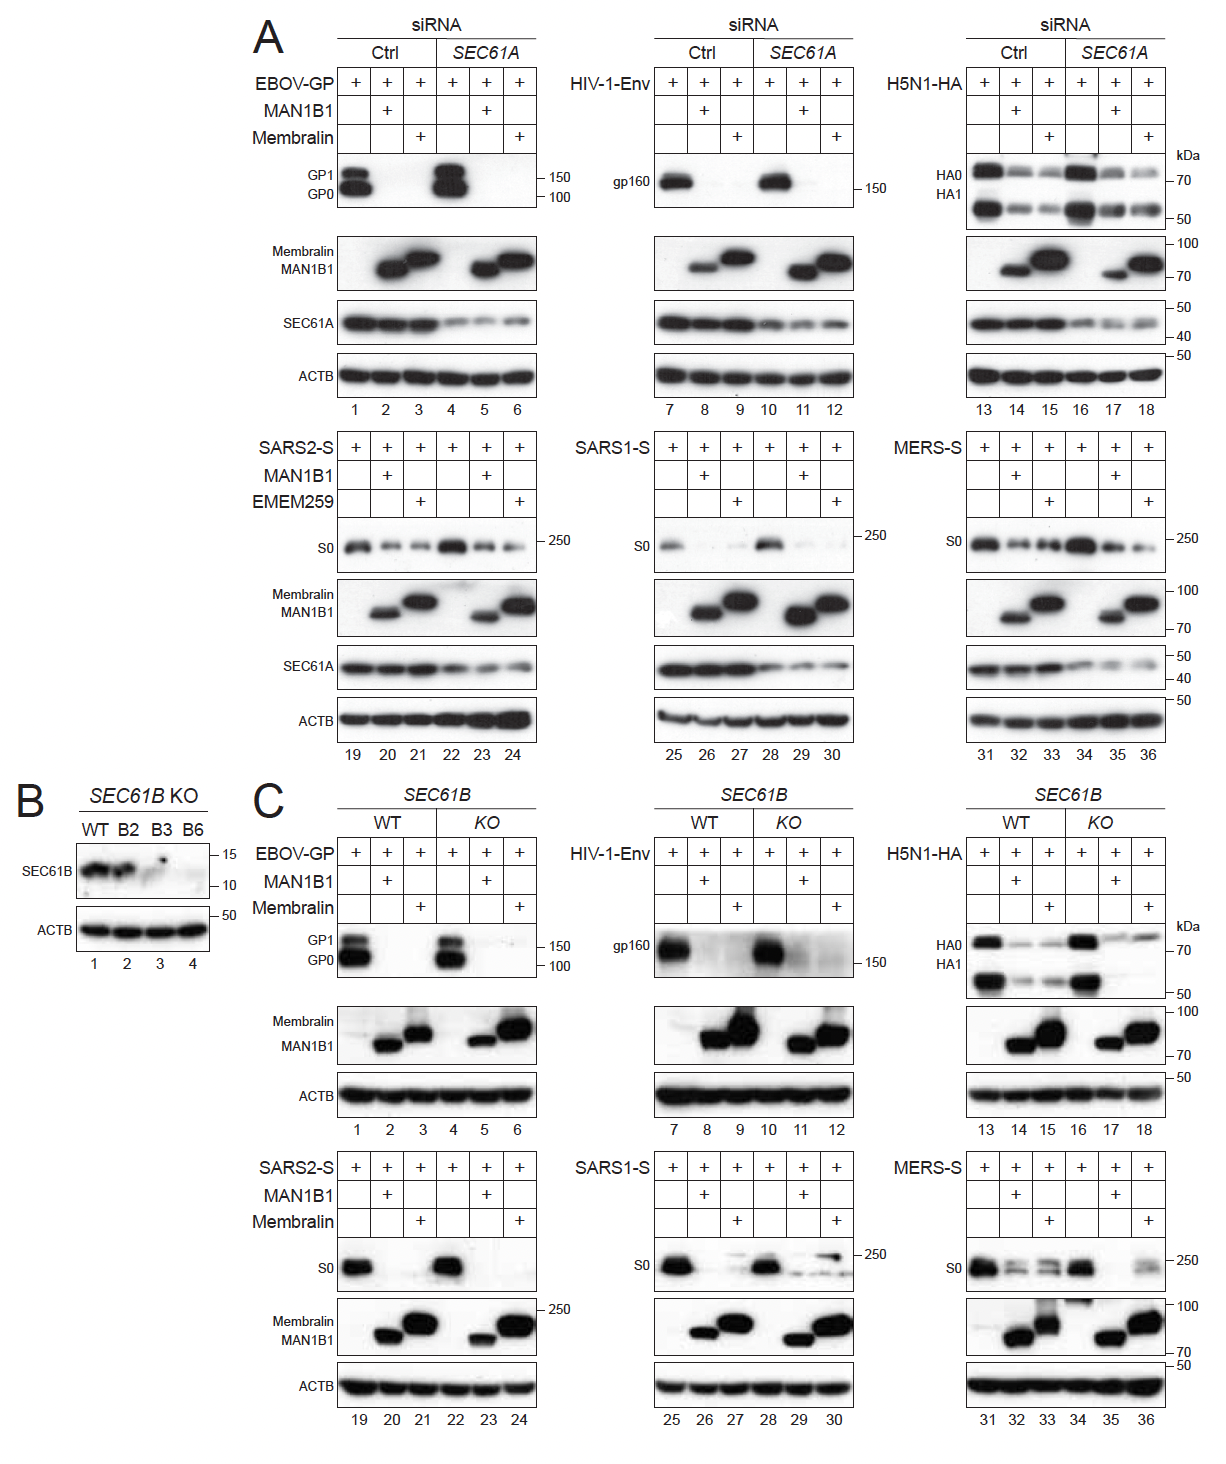
**

**Fig. S3. Detection of SARS2-S and Membralin trafficking to lysosomes by live-cell imaging.**

SARS2-S-GFP, LAMP1-mCherry, and Membralin-BFP were expressed in HEK293T cells in the absence or presence of ectopic MAN1B1. Images were captured by Airyscan super-resolution microscopy every 5 min for 12.8 or 23.3 hours. Scale bar, 5 μm.

**MAN1B1 (-)**

**
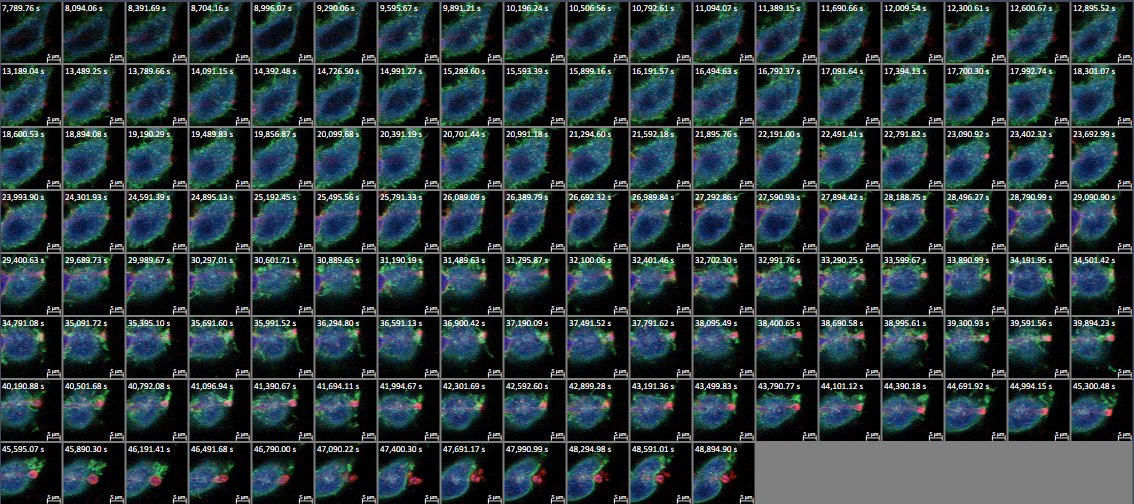
**

**MAN1B1 (+)**

**
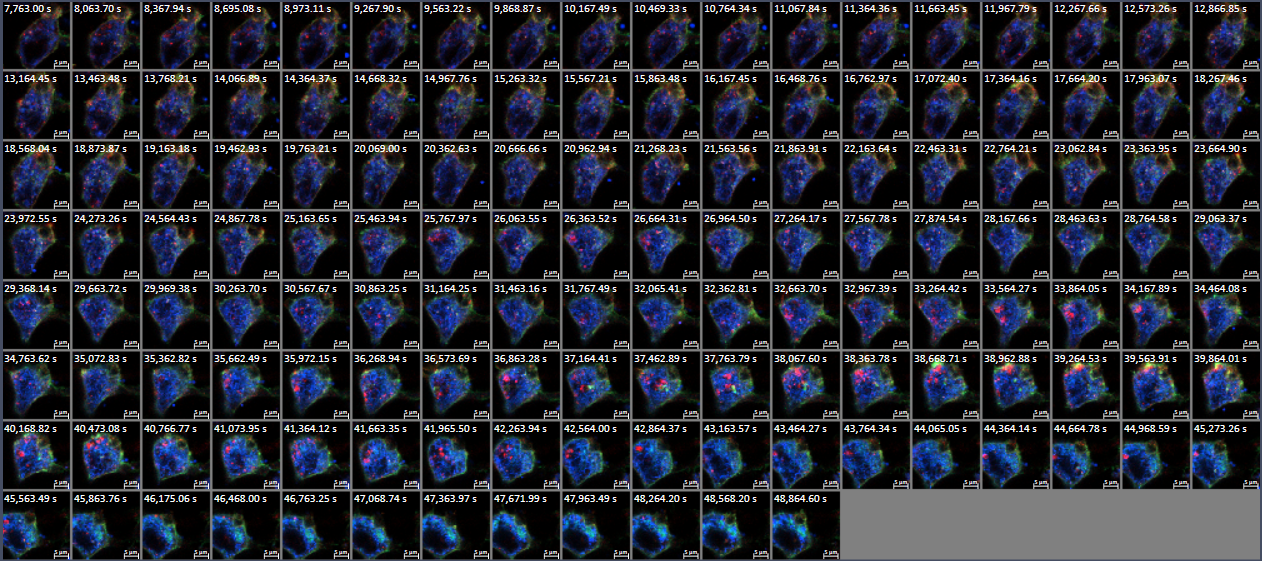
**

**Fig. S4. MAN1B1 does not engage with well-known ER-phagy receptors to degrade misfolded proteins and aggregates.**

Indicated misfolded proteins were expressed with MAN1B1 in HEK293T WT and indicated KO cells. Protein expression was determined by WB.


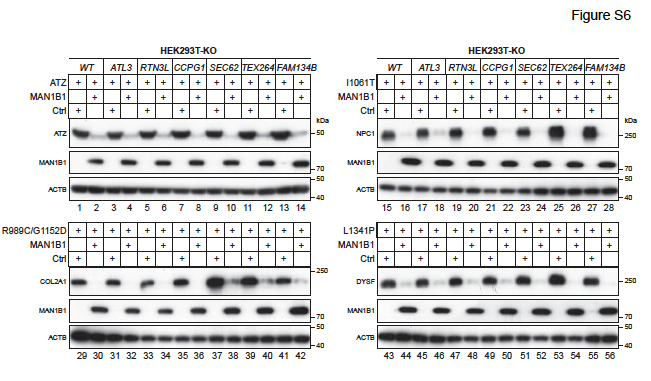

Supplement: Supplementary file 1 [file fe73472f5d387e1ea8326088.docx]
